# Supplementary material
Source: PubMed Central journal article supplement (PMC3244315)
Supplement: 10.4300_JGME-03-04-497.s1.pdf [file 10.4300_JGME-03-04-497.s1.pdf]

## 1. Role of Career Resources in the Career-Decision Making Process

Making a career decision is considered the most difficult choice faced by medical students. Students have many resources to obtain information to make their career decision, yet there is limited information on the usefulness of these resources to students.

This short survey is designed to determine the roles of various career resources (e.g CaRMS website, career counsellors, mentors, etc.) in the career decision making process.

This study has been approved by Research Ethics Boards at the University of Toronto, Dalhousie University, University of Ottawa, University of British Columbia, University of Manitoba, University of Western Ontario, McMaster University, Memorial University and Queen's University.

## 2. Demographics Section

PAGE 1 OF 6

### 1. What medical school do you attend?

### 2. How old were you when you started medical school?

### 3. Please indicate your gender:

Male

Female

Other

Prefer not to answer

### 3. Career Selection Section

**1. Please indicate how much you agree with the following statement: I am certain I made the right career decision.**

- Strongly disagree
- Disagree
- Neutral
- Agree
- Strongly Agree

**2. Please indicate what you thought your chance was of getting your top-ranked choice (i.e. first ranked) of both specialty and location.**

- I thought it was a sure thing
- I thought I probably could get in
- I thought my chances weren't great, but not impossible
- I thought it was close to impossible

Please describe why you indicated the response to question 5

**1. Please indicate the specialty you**

|                                         | Ranked First in the CaRMS<br>match | Ranked Second in the<br>CaRMS match | Ranked Third in the CaRMS<br>match | Matched to in the CaRMS<br>match |
|-----------------------------------------|------------------------------------|-------------------------------------|------------------------------------|----------------------------------|
| Anatomical Pathology                    | <input type="checkbox"/>           | <input type="checkbox"/>            | <input type="checkbox"/>           | <input type="checkbox"/>         |
| Anesthesia                              | <input type="checkbox"/>           | <input type="checkbox"/>            | <input type="checkbox"/>           | <input type="checkbox"/>         |
| Cardiac Surgery                         | <input type="checkbox"/>           | <input type="checkbox"/>            | <input type="checkbox"/>           | <input type="checkbox"/>         |
| Community Medicine                      | <input type="checkbox"/>           | <input type="checkbox"/>            | <input type="checkbox"/>           | <input type="checkbox"/>         |
| Dermatology                             | <input type="checkbox"/>           | <input type="checkbox"/>            | <input type="checkbox"/>           | <input type="checkbox"/>         |
| Diagnostic Radiology                    | <input type="checkbox"/>           | <input type="checkbox"/>            | <input type="checkbox"/>           | <input type="checkbox"/>         |
| Emergency Medicine                      | <input type="checkbox"/>           | <input type="checkbox"/>            | <input type="checkbox"/>           | <input type="checkbox"/>         |
| Family Medicine                         | <input type="checkbox"/>           | <input type="checkbox"/>            | <input type="checkbox"/>           | <input type="checkbox"/>         |
| General Pathology                       | <input type="checkbox"/>           | <input type="checkbox"/>            | <input type="checkbox"/>           | <input type="checkbox"/>         |
| General Surgery                         | <input type="checkbox"/>           | <input type="checkbox"/>            | <input type="checkbox"/>           | <input type="checkbox"/>         |
| Hematological Pathology                 | <input type="checkbox"/>           | <input type="checkbox"/>            | <input type="checkbox"/>           | <input type="checkbox"/>         |
| Internal Medicine                       | <input type="checkbox"/>           | <input type="checkbox"/>            | <input type="checkbox"/>           | <input type="checkbox"/>         |
| Laboratory Medicine                     | <input type="checkbox"/>           | <input type="checkbox"/>            | <input type="checkbox"/>           | <input type="checkbox"/>         |
| Medical Biochemistry                    | <input type="checkbox"/>           | <input type="checkbox"/>            | <input type="checkbox"/>           | <input type="checkbox"/>         |
| Medical Genetics                        | <input type="checkbox"/>           | <input type="checkbox"/>            | <input type="checkbox"/>           | <input type="checkbox"/>         |
| Medical Microbiology                    | <input type="checkbox"/>           | <input type="checkbox"/>            | <input type="checkbox"/>           | <input type="checkbox"/>         |
| Neurology                               | <input type="checkbox"/>           | <input type="checkbox"/>            | <input type="checkbox"/>           | <input type="checkbox"/>         |
| Pediatric Neurology                     | <input type="checkbox"/>           | <input type="checkbox"/>            | <input type="checkbox"/>           | <input type="checkbox"/>         |
| Neuropathology                          | <input type="checkbox"/>           | <input type="checkbox"/>            | <input type="checkbox"/>           | <input type="checkbox"/>         |
| Neurosurgery                            | <input type="checkbox"/>           | <input type="checkbox"/>            | <input type="checkbox"/>           | <input type="checkbox"/>         |
| Nuclear Medicine                        | <input type="checkbox"/>           | <input type="checkbox"/>            | <input type="checkbox"/>           | <input type="checkbox"/>         |
| Obstetrics/Gynecology                   | <input type="checkbox"/>           | <input type="checkbox"/>            | <input type="checkbox"/>           | <input type="checkbox"/>         |
| Occupational Medicine                   | <input type="checkbox"/>           | <input type="checkbox"/>            | <input type="checkbox"/>           | <input type="checkbox"/>         |
| Ophthalmology                           | <input type="checkbox"/>           | <input type="checkbox"/>            | <input type="checkbox"/>           | <input type="checkbox"/>         |
| Orthopedic Surgery                      | <input type="checkbox"/>           | <input type="checkbox"/>            | <input type="checkbox"/>           | <input type="checkbox"/>         |
| Otolaryngology                          | <input type="checkbox"/>           | <input type="checkbox"/>            | <input type="checkbox"/>           | <input type="checkbox"/>         |
| Pediatrics                              | <input type="checkbox"/>           | <input type="checkbox"/>            | <input type="checkbox"/>           | <input type="checkbox"/>         |
| Physical Medicine and<br>Rehabilitation | <input type="checkbox"/>           | <input type="checkbox"/>            | <input type="checkbox"/>           | <input type="checkbox"/>         |
| Plastic Surgery                         | <input type="checkbox"/>           | <input type="checkbox"/>            | <input type="checkbox"/>           | <input type="checkbox"/>         |
| Psychiatry                              | <input type="checkbox"/>           | <input type="checkbox"/>            | <input type="checkbox"/>           | <input type="checkbox"/>         |
| Radiation Oncology                      | <input type="checkbox"/>           | <input type="checkbox"/>            | <input type="checkbox"/>           | <input type="checkbox"/>         |
| Urology                                 | <input type="checkbox"/>           | <input type="checkbox"/>            | <input type="checkbox"/>           | <input type="checkbox"/>         |
| Not applicable                          | <input type="checkbox"/>           | <input type="checkbox"/>            | <input type="checkbox"/>           | <input type="checkbox"/>         |

## 5. Career Resource Use Section

PAGE 3 OF 6

### **1. I felt I had sufficient resources to make an informed choice about my career.**

- Strongly Disagree
- Disagree
- Neutral
- Agree
- Strongly Agree

### **2. Did you receive a copy of the Canadian Medical Residency Guide? (Last year it was distributed as a 198 page electronic pdf file.)**

- Yes
- No

### **3. Did you consult the Canadian Medical Residency Guide in making your career decision?**

- Yes
- No

**1. If you answered that you did not consult the Canadian Medical Residency Guide, please select why:**

- Did not receive a copy
- Enough resources already
- Not user friendly/Hard to navigate
- Didn't seem useful
- I was concerned about bias
- Concerned there might not be resident input
- I lost it
- I don't know why

Other (please specify)

**1. Please indicate how much you agree with the following statements:**

|                                                                                         | Strongly Disagree     | Disagree              | Neutral               | Agree                 | Strongly Agree        |
|-----------------------------------------------------------------------------------------|-----------------------|-----------------------|-----------------------|-----------------------|-----------------------|
| The guide was organized and easy to follow                                              | <input type="radio"/> |
| I was better able to make a decision after reading the Canadian Medical Residency Guide | <input type="radio"/> |
| The financial information was written at an appropriate level for me                    | <input type="radio"/> |
| I would recommend other medical students use this resource                              | <input type="radio"/> |

**2. Please indicate which year of medical school you would have found the information in the Canadian Medical Residency Guide most useful. (For schools with three year programs, please choose year 4 if you think it was most useful in your final year)**

- Year 1
- Year 2
- Year 3
- Year 4/Final year

**3. What format do you think the Canadian Medical Residency Guide would have been most useful to you?**

- USB Key
- Book
- Interactive website

**4. Did you use the free space on the USB Key?**

- Yes
- No

In the following set of questions, there is a list of various sources of information you may have used to make your career decision.

How much did these resources:

**\* 1. Help you figure out your own priorities in terms of what's involved in the decision making process?**

|                                  | I didn't consult this resource | No impact on my decision | Some impact on my decision | Couldn't have made the decision without this resource |
|----------------------------------|--------------------------------|--------------------------|----------------------------|-------------------------------------------------------|
| Canadian Medical Residency Guide | <input type="checkbox"/>       | <input type="checkbox"/> | <input type="checkbox"/>   | <input type="checkbox"/>                              |
| Career information sessions      | <input type="checkbox"/>       | <input type="checkbox"/> | <input type="checkbox"/>   | <input type="checkbox"/>                              |
| Career counselor                 | <input type="checkbox"/>       | <input type="checkbox"/> | <input type="checkbox"/>   | <input type="checkbox"/>                              |
| CaRMS website                    | <input type="checkbox"/>       | <input type="checkbox"/> | <input type="checkbox"/>   | <input type="checkbox"/>                              |
| Program website                  | <input type="checkbox"/>       | <input type="checkbox"/> | <input type="checkbox"/>   | <input type="checkbox"/>                              |
| Mentor                           | <input type="checkbox"/>       | <input type="checkbox"/> | <input type="checkbox"/>   | <input type="checkbox"/>                              |
| Peer                             | <input type="checkbox"/>       | <input type="checkbox"/> | <input type="checkbox"/>   | <input type="checkbox"/>                              |
| Family/Friends                   | <input type="checkbox"/>       | <input type="checkbox"/> | <input type="checkbox"/>   | <input type="checkbox"/>                              |

**\* 2. Help you decide which specialties to apply to?**

|                                  | I didn't consult this resource | No impact on my decision | Some impact on my decision | Couldn't have made the decision without this resource |
|----------------------------------|--------------------------------|--------------------------|----------------------------|-------------------------------------------------------|
| Canadian Medical Residency Guide | <input type="checkbox"/>       | <input type="checkbox"/> | <input type="checkbox"/>   | <input type="checkbox"/>                              |
| Career information sessions      | <input type="checkbox"/>       | <input type="checkbox"/> | <input type="checkbox"/>   | <input type="checkbox"/>                              |
| Career counselor                 | <input type="checkbox"/>       | <input type="checkbox"/> | <input type="checkbox"/>   | <input type="checkbox"/>                              |
| CaRMS website                    | <input type="checkbox"/>       | <input type="checkbox"/> | <input type="checkbox"/>   | <input type="checkbox"/>                              |
| Program website                  | <input type="checkbox"/>       | <input type="checkbox"/> | <input type="checkbox"/>   | <input type="checkbox"/>                              |
| Mentor                           | <input type="checkbox"/>       | <input type="checkbox"/> | <input type="checkbox"/>   | <input type="checkbox"/>                              |
| Peer                             | <input type="checkbox"/>       | <input type="checkbox"/> | <input type="checkbox"/>   | <input type="checkbox"/>                              |
| Family/Friends                   | <input type="checkbox"/>       | <input type="checkbox"/> | <input type="checkbox"/>   | <input type="checkbox"/>                              |

### \* 3. Help you decide which program locations (i.e. cities) to apply to?

|                                  | I didn't consult this resource | No impact on my decision | Some impact on my decision | Couldn't have made the decision without this resource |
|----------------------------------|--------------------------------|--------------------------|----------------------------|-------------------------------------------------------|
| Canadian Medical Residency Guide | <input type="checkbox"/>       | <input type="checkbox"/> | <input type="checkbox"/>   | <input type="checkbox"/>                              |
| Career information sessions      | <input type="checkbox"/>       | <input type="checkbox"/> | <input type="checkbox"/>   | <input type="checkbox"/>                              |
| Career counselor                 | <input type="checkbox"/>       | <input type="checkbox"/> | <input type="checkbox"/>   | <input type="checkbox"/>                              |
| CaRMS website                    | <input type="checkbox"/>       | <input type="checkbox"/> | <input type="checkbox"/>   | <input type="checkbox"/>                              |
| Program website                  | <input type="checkbox"/>       | <input type="checkbox"/> | <input type="checkbox"/>   | <input type="checkbox"/>                              |
| Mentor                           | <input type="checkbox"/>       | <input type="checkbox"/> | <input type="checkbox"/>   | <input type="checkbox"/>                              |
| Peer                             | <input type="checkbox"/>       | <input type="checkbox"/> | <input type="checkbox"/>   | <input type="checkbox"/>                              |
| Family/Friends                   | <input type="checkbox"/>       | <input type="checkbox"/> | <input type="checkbox"/>   | <input type="checkbox"/>                              |

In the following set of questions, there is a list of various sources of information you may have used to make your career decision.

How much did these resources:

**\* 1. Help you prepare your CaRMS application (CV, personal statement, inclusion of reference letters)**

|                                  | I didn't consult this resource | No impact on my decision | Some impact on my decision | Couldn't have made the decision without this resource |
|----------------------------------|--------------------------------|--------------------------|----------------------------|-------------------------------------------------------|
| Canadian Medical Residency Guide | <input type="checkbox"/>       | <input type="checkbox"/> | <input type="checkbox"/>   | <input type="checkbox"/>                              |
| Career information sessions      | <input type="checkbox"/>       | <input type="checkbox"/> | <input type="checkbox"/>   | <input type="checkbox"/>                              |
| Career counselor                 | <input type="checkbox"/>       | <input type="checkbox"/> | <input type="checkbox"/>   | <input type="checkbox"/>                              |
| CaRMS website                    | <input type="checkbox"/>       | <input type="checkbox"/> | <input type="checkbox"/>   | <input type="checkbox"/>                              |
| Program website                  | <input type="checkbox"/>       | <input type="checkbox"/> | <input type="checkbox"/>   | <input type="checkbox"/>                              |
| Mentor                           | <input type="checkbox"/>       | <input type="checkbox"/> | <input type="checkbox"/>   | <input type="checkbox"/>                              |
| Peer                             | <input type="checkbox"/>       | <input type="checkbox"/> | <input type="checkbox"/>   | <input type="checkbox"/>                              |
| Family/Friends                   | <input type="checkbox"/>       | <input type="checkbox"/> | <input type="checkbox"/>   | <input type="checkbox"/>                              |

**\* 2. Help you make your rank-order list?**

|                                  | I didn't consult this resource | No impact on my decision | Some impact on my decision | Couldn't have made the decision without this resource |
|----------------------------------|--------------------------------|--------------------------|----------------------------|-------------------------------------------------------|
| Canadian Medical Residency Guide | <input type="checkbox"/>       | <input type="checkbox"/> | <input type="checkbox"/>   | <input type="checkbox"/>                              |
| Career information sessions      | <input type="checkbox"/>       | <input type="checkbox"/> | <input type="checkbox"/>   | <input type="checkbox"/>                              |
| Career counselor                 | <input type="checkbox"/>       | <input type="checkbox"/> | <input type="checkbox"/>   | <input type="checkbox"/>                              |
| CaRMS website                    | <input type="checkbox"/>       | <input type="checkbox"/> | <input type="checkbox"/>   | <input type="checkbox"/>                              |
| Program website                  | <input type="checkbox"/>       | <input type="checkbox"/> | <input type="checkbox"/>   | <input type="checkbox"/>                              |
| Mentor                           | <input type="checkbox"/>       | <input type="checkbox"/> | <input type="checkbox"/>   | <input type="checkbox"/>                              |
| Peer                             | <input type="checkbox"/>       | <input type="checkbox"/> | <input type="checkbox"/>   | <input type="checkbox"/>                              |
| Family/Friends                   | <input type="checkbox"/>       | <input type="checkbox"/> | <input type="checkbox"/>   | <input type="checkbox"/>                              |

### \* 3. Help you decide what electives to do?

|                                  | I didn't consult this resource | No impact on my decision | Some impact on my decision | Couldn't have made the decision without this resource |
|----------------------------------|--------------------------------|--------------------------|----------------------------|-------------------------------------------------------|
| Canadian Medical Residency Guide | <input type="checkbox"/>       | <input type="checkbox"/> | <input type="checkbox"/>   | <input type="checkbox"/>                              |
| Career information sessions      | <input type="checkbox"/>       | <input type="checkbox"/> | <input type="checkbox"/>   | <input type="checkbox"/>                              |
| Career counselor                 | <input type="checkbox"/>       | <input type="checkbox"/> | <input type="checkbox"/>   | <input type="checkbox"/>                              |
| CaRMS website                    | <input type="checkbox"/>       | <input type="checkbox"/> | <input type="checkbox"/>   | <input type="checkbox"/>                              |
| Program website                  | <input type="checkbox"/>       | <input type="checkbox"/> | <input type="checkbox"/>   | <input type="checkbox"/>                              |
| Mentor                           | <input type="checkbox"/>       | <input type="checkbox"/> | <input type="checkbox"/>   | <input type="checkbox"/>                              |
| Peer                             | <input type="checkbox"/>       | <input type="checkbox"/> | <input type="checkbox"/>   | <input type="checkbox"/>                              |
| Family/Friends                   | <input type="checkbox"/>       | <input type="checkbox"/> | <input type="checkbox"/>   | <input type="checkbox"/>                              |

## 10.

Thank you very much for completing this survey!

Your responses will help shape career resources for medical students in the future.
